# Supplementary material for: Designing Ru-doped Zn3V3O8 bifunctional OER and HER catalysts through a unified computational and experimental approach
Source: Royal Society of Chemistry journal article supplement (doi:10.1039/d1nr04978j), 2021-01-01
Supplement: d1nr04978j1.pdf [file d1nr04978j1.pdf]

*Supplementary information*

**Designing Ru-doped Zn<sub>3</sub>V<sub>3</sub>O<sub>8</sub> Bifunctional OER and HER  
Catalyst Through a Unified Computational and Experimental  
Approach**

*Xuyan Zhou<sup>a,d</sup>, Xiaowei Tang<sup>c</sup>, Haitao Xu<sup>b\*</sup>, Tao Jiang<sup>a</sup>, Kailong Hu<sup>a,d</sup>, Hua-Jun Qiu<sup>a,d\*</sup>, and Xi  
Lin<sup>a,d,e\*</sup>*

*<sup>a</sup>School of Materials Science and Engineering, Harbin Institute of Technology, Shenzhen 518055,  
P. R. China*

*E-mail: [qiuhuaajun@hit.edu.cn](mailto:qiuhuaajun@hit.edu.cn),*

*[linxi@hit.edu.cn](mailto:linxi@hit.edu.cn)*

*<sup>b</sup>School of Materials Science and Engineering, Dongguan University of Technology, Dongguan  
523808, China*

*E-mail: [xuht@dgut.edu.cn](mailto:xuht@dgut.edu.cn)*

*<sup>c</sup>Mathematical School, Qilu Normal University, Jinan 250200, China*

*<sup>d</sup>Blockchain Development and Research Institute, Harbin Institute of Technology, Shenzhen  
518055, P.R. China*

*<sup>e</sup>State Key Laboratory of Advanced Welding and Joining, Harbin Institute of Technology, Harbin  
150001, P. R. China*

## ***Theoretical Section***

Spin-polarized density functional theory (DFT) calculations were carried out with the Vienna ab initio Simulation Package (VASP)<sup>1,2</sup> which uses the projector augmented wave (PAW) pseudo-potentials<sup>3</sup>. For the exchange-correlation functional we used the Perdew-Burke-Ernzerhof (PBE)<sup>4</sup> within the generalized gradient approximation (GGA). As spinel ferrites are strongly correlated systems, static electronic correlations were taken into account within the GGA+U method<sup>5</sup>, where a U value of 3.25 eV was employed for V<sup>6</sup>. The cutoff energy of 500 eV was adopted. Based on the previous work, Zn<sub>3</sub>V<sub>3</sub>O<sub>8</sub> can be obtained by partially substituting V atoms by Zn atoms in ZnV<sub>2</sub>O<sub>4</sub>. The crystallographic data of ZnV<sub>2</sub>O<sub>4</sub> can be found in crystallography open database (COD, reference no. 9012331). The [001]-oriented surfaces were simulated using slabs with 4 atomic layers and lattice vectors of  $\mathbf{a}_1 = \mathbf{a} + \mathbf{b}$  and  $\mathbf{b}_1 = -\mathbf{a} + \mathbf{b}$  ( $\mathbf{a}$ ,  $\mathbf{b}$  are the primitive vectors) for all simulations. A vacuum thickness of 12 Å was inserted to minimize the artificial interactions among the supercell images. All the atomic structures were fully relaxed until the forces on each atom being less than 0.02 eV/Å and the energy variation between two iterations being less than  $1 \times 10^{-5}$  eV. During the structural relaxation, the bottom layer metal atoms were constrained to mimic the structure of a semi-infinite solid. The Brillouin zone of each slab was sampled by a Monkhorst-Pack k-point mesh of  $4 \times 4 \times 1$  for geometry optimization and an  $8 \times 8 \times 1$  k-mesh for density of states (DOS) calculations, respectively. The Grimme's semiempirical DFT-D3 scheme of the dispersion correction was adopted to describe the van der Waals (vdW) interactions.

Water splitting is considered as two half reactions: OER and HER. Usually, the overall OER reaction is the four-electron reaction pathway.

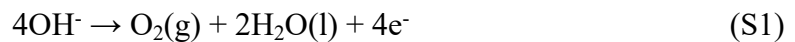

A widely used approach to model OER considers the formation of four reaction intermediates on the surface:

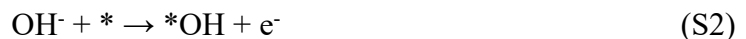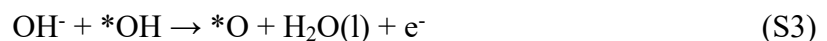

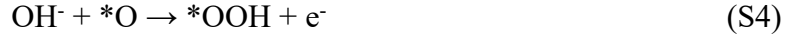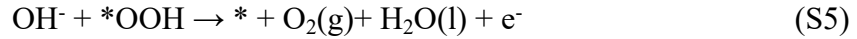

where \* represents the catalyst surface and \*OOH, \*O and \*OH species are oxygenated intermediates. The reaction free energy of each step can be calculated by

$$\Delta G = \Delta E_{\text{DFT}} + \Delta ZPE - T\Delta S - eU \quad (\text{S6})$$

where  $\Delta E_{\text{DFT}}$ ,  $\Delta ZPE$  and  $\Delta S$  are the energy changes in the DFT total energy, zero-point energy and entropy from the initial state to the final state, respectively. ZPE is obtained from vibrational frequency calculation. As for H<sub>2</sub>O and H<sub>2</sub> molecules, their entropy values are taken from the NIST-JANAF thermodynamics table<sup>7</sup>. For each adsorbate, their entropy values are computed based on (ZPE - TS) taken from VASPKIT<sup>8</sup> and ZPE. The theoretical overpotential  $\eta$  is determined by the potential limiting step:

$$\eta = \Delta G_{\text{max}}/e - U_0 \quad (\text{S7})$$

In order to establish trends in reactivity, the overpotential is often related to binding energy differences. The binding energy of the intermediate species to the surface are defined as:

$$\Delta G_{* \text{O}} = E_{* \text{O}} - E^* - E_{\text{H}_2\text{O}} + E_{\text{H}_2} + \Delta ZPE - T\Delta S \quad (\text{S8})$$

$$\Delta G_{* \text{OH}} = E_{* \text{OH}} - E^* - E_{\text{H}_2\text{O}} + (1/2)E_{\text{H}_2} + \Delta ZPE - T\Delta S \quad (\text{S9})$$

$$\Delta G_{* \text{OOH}} = E_{* \text{OOH}} - E^* - 2E_{\text{H}_2\text{O}} + (3/2)E_{\text{H}_2} + \Delta ZPE - T\Delta S \quad (\text{S10})$$

where  $E^*$ ,  $E_{* \text{O}}$ ,  $E_{* \text{OH}}$  and  $E_{* \text{OOH}}$  are the DFT total energies of a clean catalyst surface and that absorbed by a O, OH and OOH species, respectively;  $E_{\text{H}_2\text{O}}$  and  $E_{\text{H}_2}$  are the energies of a H<sub>2</sub>O and H<sub>2</sub> molecule in a vacuum, respectively.

For HER, the overall reaction is

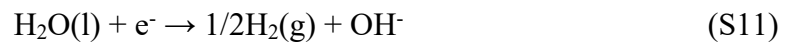

A widely used approach to model HER considers the formation of the following reaction intermediate on the surface.

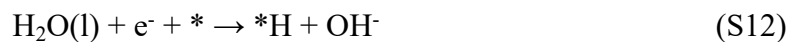

The calculated reaction free energy ( $\Delta G_{* \text{H}}$ ) under electrode potential  $U = 0$  V can be calculated by:

$$\Delta G_{*H} = E_{*H} - E^* - (1/2)E_{H_2} + \Delta ZPE - T\Delta S \quad (S13)$$

The optimal value for HER is  $\Delta G_{*H} = 0$ , which means that the smaller the  $|\Delta G_{*H}|$ , the better HER performance the material.

### ***Experimental Section***

**Preparation of the precursors:** 200 mg  $V_2O_5$ , 300 mg  $Zn(NO_3)_2 \cdot 6H_2O$ , 280 mg hexamethylenetetramine, and 500 mg sodium sulfate were dissolved in 35 mL distilled water under vigorous stirring for 30 min. The obtained mixture was transferred into 50 mL Teflon-lined stainless steel autoclave which was sealed and treated at 110 °C for 24 h in oven. The obtained sample on the bottom of autoclave was ZnV-LDHs precursor. Similarly, ZnVRu-LDHs was prepared based on the same procedure except for the extra 10 mg  $RuCl_3 \cdot 3H_2O$ . Then, all the precursors were washed with deionized water and pure ethanol thoroughly, followed by drying overnight in a vacuum oven at 60 °C.

**Fabricating hierarchical porous undoped and Ru-doped  $Zn_3V_3O_8$ :** The precursors were put in the middle of the quartz boat which was put in a horizontal quartz tube furnace. A programmed heating process was adopted in the quartz tube furnace under Ar/ $H_2$  (Ar=40 SCCM;  $H_2$ =10 SCCM) atmosphere (Detailedly, 25 °C to 500 °C with a rate of 5 °C  $min^{-1}$ , and then from 500 °C to 600 °C with a rate of 1°C  $min^{-1}$ , finally held at 600 °C for 120 min). After dissolving ZnO in 0.1 M NaOH solution, the undoped and Ru-doped  $Zn_3V_3O_8$  were collected by centrifugation using deionized water.

**Characterizations:** Scanning electron microscope (FESEM, JSM-7800F), transmission electron microscopy (TEM, Philips, Tecnai, F30) coupled with energy-dispersive X-ray spectrometry (EDS) analyser and high-angle annular dark-file scanning trans-mission electron microscopy (HAADF-STEM) images were collected on JEOL JEMARM200F microscope incorporated with a spherical aberration correction system for STEM; X-ray photoelectron spectroscopy (XPS, PHI 5000 Versaprobe) and powder X-ray diffraction (XRD, Bruker D8 Advance X-ray

diffractometer with Cu K $\alpha$  radiation) were adopted to characterize the as-prepared samples.

**Electrochemical OER and HER tests:** The as-synthesized samples were dispersed into a mixed solution of 10 vol.% Nafion (0.5 wt.%) and 90 vol.% ethanol to form a homogeneous slurry which was evenly painted on carbon fiber paper with a catalyst loading of 2 mg cm<sup>-2</sup> as a working electrode. Saturated calomel electrode (SCE), and graphite rod worked as the reference and counter electrodes, respectively. The three electrode cell with 1.0 M KOH electrolyte was tested on a CHI 660D electrochemical work station (CH Instruments, Inc., Shanghai). The potential values were changed to E (vs. RHE) from E (vs. SCE) according to the formula:  $E_{\text{RHE}} = E_{\text{SCE}} + 0.059\text{pH} + E_{\text{SCE}}^0$ ; the overpotential ( $\eta$ ) for OER was calculated according to the following formula:  $\eta$  (V) =  $E_{\text{RHE}} - 1.23$  V.

## Figures

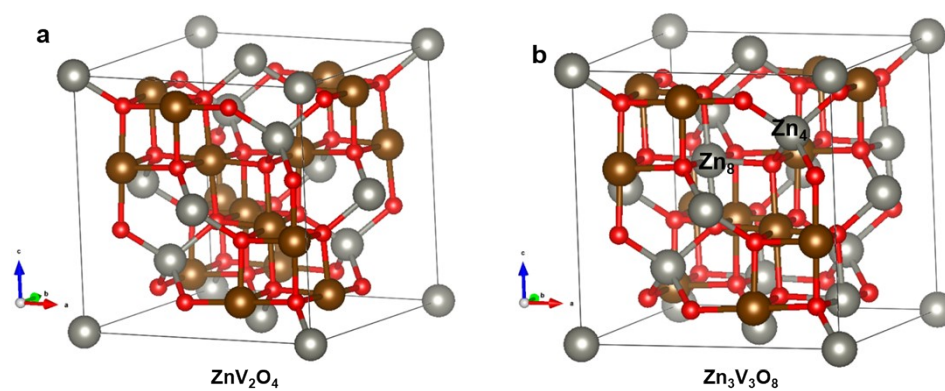

**Fig. S1** Structures of  $\text{ZnV}_2\text{O}_4$  (a) and  $\text{Zn}_3\text{V}_3\text{O}_8$  (b). Brown, grey and red balls represent the V, Zn and O atoms, respectively. Meanwhile, Zn atom at a tetrahedral site and a octahedral site are labeled as  $\text{Zn}_4$  and  $\text{Zn}_8$ , respectively.

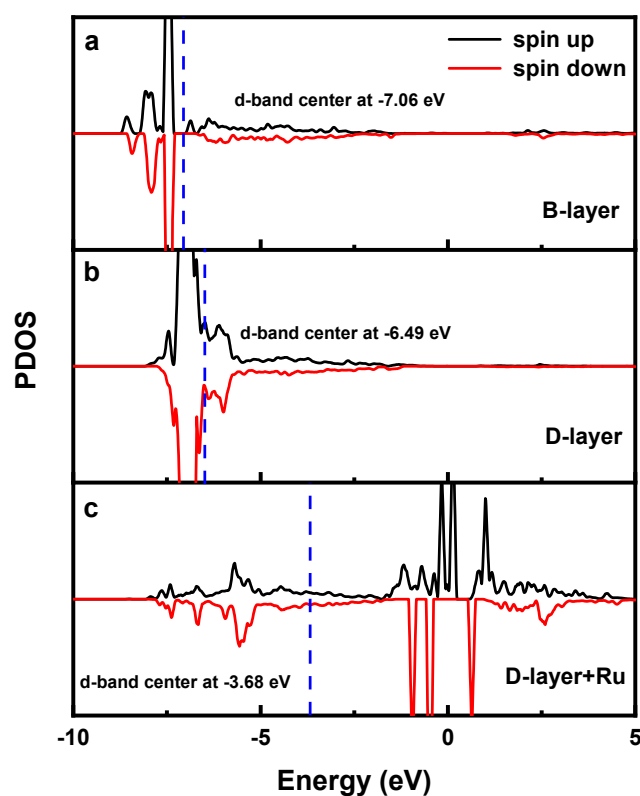

**Fig. S2** Projected DOS from d-orbital of  $\text{Zn}_4$  at B-layer (a),  $\text{Zn}_4$  at D-layer (b) and Ru at Ru-doped D-layer (c).

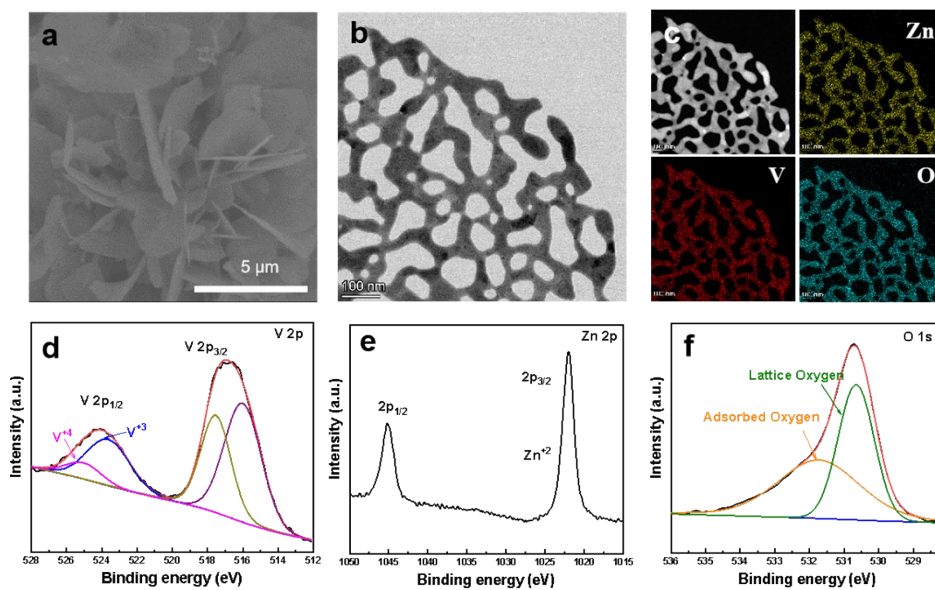

**Fig. S3** SEM (a) and TEM (b) and the corresponding elemental mappings (c) of the undoped  $\text{Zn}_3\text{V}_3\text{O}_8$  sample. XPS spectra of V 2p (d), Zn 2p (e) and O 1s (f) of the undoped  $\text{Zn}_3\text{V}_3\text{O}_8$ .

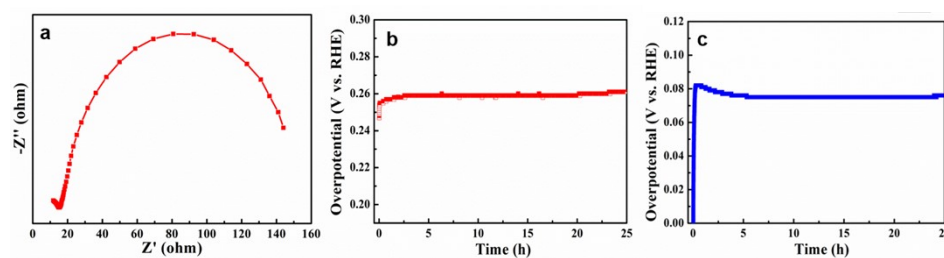

**Fig. S4** (a) EIS of Ru-doped  $\text{Zn}_3\text{V}_3\text{O}_8$  in 1.0 M KOH; (b) OER durability test for Ru-doped  $\text{Zn}_3\text{V}_3\text{O}_8$  at the current density of  $10 \text{ mA cm}^{-2}$ ; (c) HER durability test for Ru-doped  $\text{Zn}_3\text{V}_3\text{O}_8$  at the current density of  $10 \text{ mA cm}^{-2}$ .

## Tables

**Table S1** Surface energies ( $E_{surf}$ ) of four terminations.  $E_{surf}$  is calculated by the formula:

$E_{surf} = \frac{E_{slab} - N \times E_{bulk}}{2A}$ , where  $E_{slab}$  and  $E_{bulk}$  are energies of each termination and  $Zn_3V_3O_8$  bulk, respectively.

|                                  | A-layer | B-layer | C-layer | D-layer |
|----------------------------------|---------|---------|---------|---------|
| $E_{surf}$ (eV Å <sup>-2</sup> ) | 0.103   | 0.084   | 0.106   | 0.086   |

**Table S2** Reaction free energies of each step ( $U = 0$ ) and overpotentials for the Ru-doped C-layer and D-layer terminations. The rate-limiting steps for each reaction site and the lowest overpotential are highlighted in bold font.

| Reaction site                            |                                    | $\Delta G_1$ (eV) | $\Delta G_2$ (eV) | $\Delta G_3$ (eV) | $\Delta G_4$ (eV) | $\eta$ (V)  |
|------------------------------------------|------------------------------------|-------------------|-------------------|-------------------|-------------------|-------------|
| C-layer+Ru<br>(replace V)                | Ru(V)                              | -0.12             | 0.37              | <b>2.66</b>       | 2.01              | 1.43        |
|                                          | V(V)                               | 0.36              | 0.63              | <b>2.56</b>       | 1.37              | 1.33        |
| C-layer+Ru<br>(replace Zn <sub>8</sub> ) | Ru(Zn <sub>8</sub> )               | -0.11             | 0.51              | <b>2.37</b>       | 2.15              | <b>1.14</b> |
|                                          | V(Zn <sub>8</sub> )                | 0.30              | 0.56              | <b>2.65</b>       | 1.41              | 1.42        |
| D-layer+Ru<br>(replace V)                | Ru(V)                              | 0.15              | 0.64              | <b>2.18</b>       | 1.95              | 0.95        |
|                                          | V(V)                               | 0.25              | 0.73              | <b>2.44</b>       | 1.50              | 1.21        |
|                                          | Zn <sub>4</sub> (V)                | 0.33              | <b>2.48</b>       | 0.85              | 1.26              | 1.25        |
| D-layer+Ru<br>(replace Zn <sub>4</sub> ) | Ru(Zn <sub>4</sub> )               | -0.20             | 0.41              | <b>2.46</b>       | 2.25              | 1.23        |
|                                          | V(Zn <sub>4</sub> )                | 0.24              | 0.62              | <b>2.56</b>       | 1.50              | 1.33        |
|                                          | Zn <sub>4</sub> (Zn <sub>4</sub> ) | 0.08              | <b>2.51</b>       | 0.73              | 1.60              | 1.28        |
| D-layer+Ru<br>(replace Zn <sub>8</sub> ) | Ru(Zn <sub>8</sub> )               | -0.15             | 0.93              | 2.02              | <b>2.12</b>       | <b>0.89</b> |
|                                          | V(Zn <sub>8</sub> )                | 0.38              | 0.69              | <b>2.09</b>       | 1.76              | <b>0.86</b> |
|                                          | Zn <sub>4</sub> (Zn <sub>8</sub> ) | -0.02             | <b>2.46</b>       | 0.74              | 1.74              | 1.23        |



**Table S3** Binding energies ( $E_{bind}$ ) of Ru on B-layer and D-layer.  $E_{bind}$  is calculated by:  $E_{bind} = E_{total} - E_{sub-Zn/V} - E_{Ru}/n$ , where  $E_{total}$ ,  $E_{sub-Zn/V}$  and  $E_{Ru}/n$  are energies of Ru doped  $Zn_3V_3O_8$ , the termination except replacing Zn or V atom and a Ru atom in the bulk, respectively.

|                 | B-layer |                      | D-layer |                      |                      |
|-----------------|---------|----------------------|---------|----------------------|----------------------|
|                 | Ru(V)   | Ru(Zn <sub>4</sub> ) | Ru(V)   | Ru(Zn <sub>4</sub> ) | Ru(Zn <sub>8</sub> ) |
| $E_{bind}$ (eV) | 0.254   | 3.451                | 0.580   | 3.261                | 0.905                |

**Table S4** Free energies of H adsorption for different reaction sites at the Ru-doped A-layer and B-layer terminations. The small  $|\Delta G_{*H}|$  is highlighted in bold font.

| Reaction site                            |                                    | $\Delta G_{*H}$ (eV) |
|------------------------------------------|------------------------------------|----------------------|
| A-layer+Ru<br>(replace V)                | Ru(V)                              | <b>0.04</b>          |
|                                          | V(V)                               | 1.09                 |
| B-layer+Ru<br>(replace V)                | Ru(V)                              | 0.50                 |
|                                          | V(V)                               | 1.41                 |
|                                          | Zn <sub>4</sub> (V)                | 0.47                 |
| B-layer+Ru<br>(replace Zn <sub>4</sub> ) | Ru(Zn <sub>4</sub> )               | -0.60                |
|                                          | V(Zn <sub>4</sub> )                | 1.45                 |
|                                          | Zn <sub>4</sub> (Zn <sub>4</sub> ) | <b>0.27</b>          |
| C-layer+Ru<br>(replace V)                | Ru(V)                              | <b>-0.19</b>         |
|                                          | V(V)                               | 1.00                 |
|                                          | Zn <sub>8</sub> (V)                | 1.34                 |
| C-layer+Ru<br>(replace Zn <sub>8</sub> ) | Ru(Zn <sub>8</sub> )               | <b>-0.23</b>         |
|                                          | V(Zn <sub>8</sub> )                | 0.70                 |
|                                          | Zn <sub>8</sub> (Zn <sub>8</sub> ) | 1.04                 |

**Table S5** Zero-point energy (ZPE) and entropy correction (TS) at T = 298 K for relevant species.

| Species          | ZPE (eV) | TS (eV) |
|------------------|----------|---------|
| H <sub>2</sub> O | 0.56     | 0.67    |
| H <sub>2</sub>   | 0.27     | 0.41    |
| *OOH             | 0.35     | 0       |
| *OH              | 0.31     | 0.01    |
| *O               | 0.05     | 0       |
| *H               | 0.19     | 0       |

**Table S6** Comparison of OER catalytic performances.

| Catalyst                                         | Tafel slope<br>(mV/dec) | Overpotential<br>at 10 mA cm <sup>-2</sup> (mV) | Reference                                                         |
|--------------------------------------------------|-------------------------|-------------------------------------------------|-------------------------------------------------------------------|
| Ru/Zn <sub>3</sub> V <sub>3</sub> O <sub>8</sub> | 81.9                    | 250                                             | This work                                                         |
| NiCo <sub>2</sub> O <sub>4</sub>                 | 90                      | 460                                             | <i>J. Mater. Chem. A</i> , 2014, <b>2</b> ,<br>20823-20831        |
| Au/NiCo <sub>2</sub> O <sub>4</sub>              | 63                      | 360                                             | <i>ChemCatChem</i> , 2014, <b>6</b> , 2501-<br>2506               |
| IrNiO <sub>x</sub>                               | /                       | 320                                             | <i>Angew. Chem. Int. Ed.</i> , 2015, <b>54</b> ,<br>2975-2979.    |
| NiC/C                                            | 46                      | 316                                             | <i>Adv. Mater.</i> , 2016, <b>28</b> , 3326                       |
| Zn <sub>x</sub> Co <sub>3-x</sub> O <sub>x</sub> | 51                      | 320                                             | <i>Chem. Mater.</i> , 2014, <b>26</b> , 1889-<br>1895             |
| NiCoP/C                                          | 96                      | 330                                             | <i>Angew. Chem. Int. Ed.</i> , 2017,<br><b>129</b> , 3955-3958    |
| Ni@graphene                                      | 66                      | 370                                             | <i>ACS Sustainable Chem. Eng.</i> ,<br>2017, <b>5</b> , 4771-4777 |
| VOOH                                             | 68                      | 270                                             | <i>Angew. Chem. Int. Ed.</i> , 2017, <b>56</b> ,<br>573-577       |
| NiV LDH                                          | 50                      | 318                                             | <i>Nat. Commun.</i> , 2016, <b>7</b> , 1-9                        |

**Table S7** Comparison of HER catalytic performances.

| Catalyst                                         | Tafel slope<br>(mV/dec) | Overpotential<br>at 10 mA cm <sup>-2</sup> (mV) | Reference                                                         |
|--------------------------------------------------|-------------------------|-------------------------------------------------|-------------------------------------------------------------------|
| Ru/Zn <sub>3</sub> V <sub>3</sub> O <sub>8</sub> | 50.6                    | 70                                              | This work                                                         |
| NiCo <sub>2</sub> O <sub>4</sub>                 | 49.7                    | 90                                              | <i>Angew. Chem. Int. Ed.</i> , 2016,<br><b>55</b> , 6290-6294     |
| NiP <sub>2</sub> NS/CC                           | 51                      | 75                                              | <i>Nanoscale</i> , 2014, <b>6</b> , 13440-<br>13445               |
| MoC <sub>x</sub>                                 | 59                      | 115                                             | <i>Nat. Commun.</i> , 2015, <b>6</b> , 6512                       |
| VOOH                                             | 104                     | 164                                             | <i>Angew. Chem. Int. Ed.</i> , 2017,<br><b>56</b> , 573-577       |
| NiFe LDH                                         | /                       | 210                                             | <i>Science</i> , 2014, <b>345</b> , 1593-1596                     |
| CoNi@NC                                          | 104                     | 224                                             | <i>Angew. Chem. Int. Ed.</i> , 2015,<br><b>54</b> , 2100-2104     |
| Pt-CoS <sub>2</sub> /CC                          | 82                      | 24                                              | <i>Adv. Energy Mater.</i> , 2018, <b>8</b> ,<br>1800935           |
| MoC <sub>x</sub> @C-1                            | 56                      | 79                                              | <i>J. Mater. Chem. A</i> , 2016, <b>4</b> ,<br>3947-3954          |
| Ni@graphene                                      | 120                     | 240                                             | <i>ACS Sustainable Chem. Eng.</i> ,<br>2017, <b>5</b> , 4771–4777 |

## References

- 1 G. Kresse and J. Furthmüller, *Comp. Mater. Sci.*, 1996, **6**, 15-50.
- 2 G. Kresse and J. Furthmüller, *Phys. Rev. B*, 1996, **54**, 11169-11186.
- 3 G. Kresse and D. Joubert, *Phys. Rev. B*, 1999, **59**, 1758-1775.
- 4 J. P. Perdew, K. Burke and M. Ernzerhof, *Phys. Rev. Lett.* 1996, **77**, 3965-3868.
- 5 S. L. Dudarev, G. A. Botton, S. Y. Savrasov, C. J. Humphreys and A. P. Sutton, *Phys. Rev. B*, 1998, **57**, 1505-1509.
- 6 V. Pardo, S. Blanco-Canosa, F. Rivadulla, D. I. Khomskii, D. Baldomir, H. Wu, and J. Rivas, *Phys. Rev. L*, 2008, **101**, 256403.
- 7 M. Chase Jr, NIST JANAF Thermochemical Tables; American Institute of Physics: New York, 1998.
- 8 V. Wang, N. Xu, J.C. Liu, G. Tang, et al, VASPKIT: A Pre- and Post-Processing Program for VASP Code, arXiv:1908.08269.
